# Supplementary material for: Core Transcription Factors Promote Induction of PAX3-Positive Skeletal Muscle Stem Cells
Source: PubMed Central journal article supplement (PMC6700474; doi:10.1016/j.stemcr.2019.06.006), 2019-07-25
Supplement: mmc1.pdf [file mmc1.pdf]

**Stem Cell Reports, Volume 13**

**Supplemental Information**

**Core Transcription Factors Promote Induction of PAX3-Positive Skeletal Muscle Stem Cells**

**Takahiko Sato, Koki Higashioka, Hidetoshi Sakurai, Takuya Yamamoto, Naoki Goshima, Morio Ueno, and Chie Sotozono**



**Figure S1. Gene profile from myogenic precursors and adult muscle stem cells of *Pax3<sup>GFP/+</sup>* mice.**

(A) 3 different developmental stages (fetus, infant, and adult mouse) were used for isolating Pax3-GFP expressing cells of skeletal muscle tissue.

(B) Principal component analysis (PCA) with Pax3-GFP cells and other types of cells including ESC (mouse embryonic stem cells), GSC (mouse germline stem cells), MEF (mouse embryonic fibroblasts), NSC (mouse neural stem cells), and iPS (mouse induced pluripotent stem cells).

(C) 107 selected genes, which are highly expressed in Pax3-expressing cells derived from 3 different stages of *Pax3<sup>GFP/+</sup>* mice, relative to other cells (see Table S1).



**Figure S2. FACS analyses with Pax3<sup>GFP/+</sup> MEFs for reprogramming.** (A) Fluorescent signals of GFP (Green) or tdTomato (Red) could be detected in mouse embryonic fibroblasts (MEFs) isolated from *Pax3-GFP; MyoD-tdTomato* embryos (upper panels). Sorted MEFs had no signal of any fluorescent proteins (lower panels). Scale bars; 50  $\mu$ m. (B) FACS data of Pax3-GFP cells expressing selected candidates, named as Group1 (*Dmrt2, Foxp2, Heyl, Lbx1, Pbx1, Mef2d, Myf5, Six1, Tshz1, Tshz3*), Group2 (*Myog, Nfib, Pknox2, Prox1, Pere, Rora, Runx1, Sox6, Tbx1, Tbx15*), Group3 (*Tbx4, Tef, Tfdp2, Thra, Yy1, Zeb2, Zfp445, Zhx1, Zkscan17, Zkscan3*), Group4 (*Egr2, Heyl, Klf4, Mef2c, MyoD, Pax3, Pax7, Pitx2*) were used for infected into MEFs. (C) Narrowing down from 8 candidate transcription factors for PAX3-expressing myogenic cells derived from sorted MEFs.



**Figure S3. 4 transcription factors convert human fibroblasts into myogenic stem cells.** (A) Immunostaining of anti-FSP1 (labelled with Alexa594, red) and anti-PAX7 (labelled with Alexa488, green) antibodies with human dermal fibroblasts. (B) PAX3, HEYL, KLF4 (+3F) and transient DOX-treatment for 72 hours (+MYOD-DOX) induced PAX7-expressing cells from human dermal fibroblasts (labelled with Alexa488, green). (C) FACS profile of CD56 and CD82 cells from cultured human dermal fibroblasts with or without PAX3, HEYL, KLF4 and DOX treatment for 72 hours (control or +3F+DOX/control). (D) Immunostaining with anti-PAX7 antibody with CD56+CD82+ double positive sorted cells. PAX7; red, DAPI; blue. (E) Transcriptome analyses of induced CD56+CD82+ cells with or without the 4 factors. All error bars indicate  $\pm$ SEM (n=3). *P*-values are determined by *t*-test from a two-tailed distribution. (F) MYHC (light blue) was stained with myogenic differentiated cells with 2% of horse serum (2%HS) from CD56+CD82+ sorted cells for 7 days. All scale bars; 50  $\mu$ m.



**Figure S4. Strategy of GFP-targeting into the PAX3 knock-in and Tet-ON MYOD1 human iPS cells.** (A) Schematic diagram of the human PAX3 locus and targeting construct. The BAC DNA construct contains more than 100kb of PAX3 genomic sequence. An EGFP reporter gene followed by floxed neomycin (fNeo) selection marker replaces the coding sequence in exon 1 of PAX3 (BAC *hPAX3-GFP-fNeo*). After homologous recombination in 201B7 hiPS cells, cells were selected by the administration of G418, and the knockin allele was confirmed by qPCR with genomic DNA and sequencing reaction ( $PAX3^{GFP-fNeo/+}$ ). The fNeo cassette is removed with expression of CAG-Cre plasmid. This generates the  $PAX3^{GFP/+}$  allele in hiPS cells. (B)  $Pax3^{GFP/+}; Tet-On MYOD$  hiPS cells were differentiated into myogenic cells with the administration of DOX for 7 days. (C) Immunostaining of terminally differentiated myotubes derived from hiPS cells with the administration of DOX for a week and 5% of Knockout Serum Replacement (KSR) was carried out according to an optimized protocol. (Tanaka et al. 2013, left panel). Neural cells appear in cultured cells with 20% of FBS instead of KSR (red, right panel). DAPI (blue), Myosin Heavy Chain (MyHC; labelled with Alexa488, Green), Neurofilament (NF; labelled with Alexa647, Red). All scale bar; 50  $\mu$ m.



**Figure S5. The comparison of induction methods for PAX3-expressing muscle stem cells from human iPS cells.** (A) Reported schematic differentiation protocols for isolating PAX3-GFP myogenic cells derived from hiPS cells (iPAX7, Darabi et al. 2012.; +GF, Chal et al. 2015). (B) FACS profile of induced PAX3-GFP cells from hiPS cells. (C) Transcriptional analyses with PAX3-GFP positive cells induced by transient DOX treatment plus 3 transcription factors (+3F+DOX), +growth factors (+GF), and transient PAX7 (+iPAX7). Ectodermal and Mesodermal GFP-expressing cells, marked by *SOX1* (neural) and *DMRT2* (dermomyotome); *CALCL* and *NAP1L5* were used as markers for adult muscle satellite cells. All error bars indicate  $\pm$ SEM (n=3). *P*-values are determined by Dunnett's multiple-comparisons test. \**P*<0.01.

**Table S2. Summarized profile of Table S1.**

38 candidate genes which show high expression in Pax3-GFP muscle stem cells.

| MuSC_E16 | MuSC_1wk | MuSC_12wk | ESC   | MEF   | GSC   | NSC    | Gene Symbol |
|----------|----------|-----------|-------|-------|-------|--------|-------------|
| 234.9    | 185.0    | 113.6     | 4.8   | 4.8   | 4.7   | 4.7    | Dmrt2       |
| 2286.2   | 5709.4   | 13794.6   | 10.1  | 161.7 | 237.7 | 93.0   | Egr2        |
| 263.4    | 278.7    | 278.0     | 8.4   | 118.4 | 7.7   | 13.7   | Foxp2       |
| 466.4    | 674.9    | 892.0     | 100.2 | 23.8  | 252.3 | 78.9   | Hey1        |
| 189.4    | 790.0    | 749.6     | 7.5   | 7.3   | 7.4   | 7.2    | Heyl        |
| 536.2    | 415.1    | 1637.4    | 224.4 | 262.6 | 93.6  | 10.4   | Klf4        |
| 140.2    | 86.1     | 74.6      | 5.0   | 5.1   | 4.9   | 4.9    | Lbx1        |
| 765.7    | 420.5    | 509.4     | 9.5   | 178.2 | 8.5   | 184.5  | Pbx1        |
| 326.3    | 725.9    | 1909.8    | 6.3   | 22.7  | 8.8   | 188.5  | Mef2c       |
| 385.8    | 521.1    | 381.8     | 16.4  | 109.3 | 76.7  | 149.0  | Mef2d       |
| 5075.5   | 4503.2   | 9603.6    | 10.1  | 10.2  | 8.6   | 8.8    | Myf5        |
| 960.1    | 2266.2   | 3791.0    | 3.5   | 3.5   | 3.4   | 3.4    | Myod1       |
| 10523.2  | 12490.2  | 4666.3    | 6.1   | 6.1   | 5.8   | 5.8    | Myog        |
| 6651.9   | 7772.7   | 5271.2    | 23.5  | 425.0 | 77.3  | 2492.1 | Nfib        |
| 231.6    | 1174.9   | 1542.6    | 17.9  | 20.7  | 15.9  | 171.2  | Pax3        |
| 3043.4   | 3078.9   | 4765.1    | 4.6   | 4.6   | 4.5   | 4.4    | Pax7        |
| 1936.7   | 2850.5   | 1779.0    | 92.1  | 164.1 | 9.9   | 9.6    | Pitx2       |
| 321.8    | 758.6    | 224.2     | 6.6   | 9.2   | 5.4   | 43.2   | Pknox2      |
| 161.6    | 733.3    | 473.6     | 7.6   | 7.0   | 6.7   | 14.0   | Prox1       |
| 804.1    | 1129.9   | 864.9     | 162.5 | 144.2 | 367.6 | 392.3  | Rere        |
| 319.0    | 543.5    | 2214.3    | 41.7  | 24.8  | 45.9  | 41.8   | Rora        |
| 125.3    | 217.6    | 1614.6    | 6.2   | 28.0  | 8.7   | 5.6    | Runx1       |
| 429.6    | 399.2    | 301.6     | 27.3  | 80.0  | 220.9 | 11.3   | Six1        |
| 406.8    | 481.9    | 281.1     | 14.4  | 17.6  | 13.5  | 153.4  | Sox6        |
| 182.4    | 228.1    | 104.4     | 5.9   | 7.9   | 7.1   | 5.9    | Tbx1        |
| 306.4    | 302.1    | 258.5     | 6.6   | 248.6 | 9.2   | 64.5   | Tbx15       |
| 76.0     | 70.6     | 127.8     | 5.5   | 16.5  | 5.2   | 5.3    | Tbx4        |
| 816.2    | 850.9    | 657.6     | 194.7 | 229.1 | 438.6 | 315.9  | Tef         |
| 2527.8   | 2323.1   | 1054.0    | 610.8 | 128.8 | 198.6 | 265.8  | Tfdp2       |
| 242.2    | 702.1    | 447.1     | 5.8   | 34.3  | 16.7  | 222.7  | Thra        |
| 2499.5   | 2727.7   | 1730.1    | 7.1   | 452.2 | 15.8  | 466.1  | Tshz1       |
| 686.8    | 740.7    | 934.0     | 16.5  | 129.1 | 16.6  | 86.2   | Tshz3       |
| 1336.7   | 995.4    | 1132.6    | 352.3 | 472.0 | 61.7  | 594.6  | Yy1         |
| 854.9    | 4935.4   | 3900.5    | 11.5  | 249.2 | 8.0   | 147.3  | Zeb2        |
| 441.2    | 887.0    | 525.6     | 165.1 | 141.6 | 177.6 | 273.0  | Zfp445      |
| 596.6    | 1129.1   | 743.8     | 145.4 | 270.0 | 128.9 | 364.6  | Zhx1        |
| 679.4    | 871.6    | 733.0     | 374.6 | 156.2 | 49.4  | 463.5  | Zkscan17    |
| 1039.6   | 755.8    | 678.5     | 77.9  | 164.8 | 157.7 | 308.7  | Zkscan3     |

**Table S3.** Primers for the expression analysis by RT-qPCR of the mRNAs indicated.

**for mouse**

| Gene              | Sequence                      | Target position | Product |
|-------------------|-------------------------------|-----------------|---------|
| <i>Rpl13a</i>     | 5'-GTGGTCCCTGCTGCTCTCAAG-3'   | exon6           | 151bp   |
|                   | 5'-CGATAGTGTCATCTTGGCCTTTT-3' | exon7           |         |
| <i>Pax7 (UTR)</i> | 5'-CCCTTCTACAGGAAACCCTCT-3'   | exon10          | 72bp    |
|                   | 5'-CTGAACCAGACCTGGACGCG-3'    | exon10          |         |
| <i>MyoD (UTR)</i> | 5'-GCGCTCTTCCTTTCTCATAG-3'    | exon2           | 90bp    |
|                   | 5'-GGGCTCCAGAAAGTGACAAAC-3'   | exon3           |         |
| <i>Myog</i>       | 5'-CAACCAGGAGGAGCGCATCTCCG-3' | exon1           | 93bp    |
|                   | 5'-GGCGCTGTGGGAGTTGCATTCAC-3' | exon2           |         |
| <i>Calcr</i>      | 5'-ATCTGGTGCGGCGGGAT-3'       | exon10          | 94bp    |
|                   | 5'-CCCTCGCAGAGCATCCAGAA-3'    | exon12          |         |
| <i>Spry1</i>      | 5'-ATGGATCCCAAGTCAGCAT-3'     | exon3           | 93bp    |
|                   | 5'-CCTGTCATAGTCTAACCTCTGCC-3' | exon3           |         |
| <i>Sdc4</i>       | 5'-GTCCCCGAGAGTCGATTC-3'      | exon1           | 193bp   |
|                   | 5'-GCACCAAGGGCTCAATCACTT-3'   | exon3           |         |
| <i>Myh3</i>       | 5'-TCCAAACCGTCTCTGCACTGTT-3'  | exon17          | 84bp    |
|                   | 5'-AGCGTACAAAGTGTGGGTGTGT-3'  | exon18          |         |
| <i>Myh7</i>       | 5'-ATGCTGACAGATCGGGAGAA -3'   | exon            | 181bp   |
|                   | 5'-GGTTGGCTTGGATGATTGA-3'     | exon            |         |
| <i>Myh1</i>       | 5'-TCTGCAGACGGAGTCAGGT-3'     | exon33          | 94bp    |
|                   | 5'-TTGAGTGAATGCCTGTTTGC-3'    | exon34          |         |
| <i>Sox1</i>       | 5'-CCTCGGATCTCTGGTCAAGT-3'    | exon1           | 107bp   |
|                   | 5'-GCAGGTACATGCTGATCACTC-3'   | exon1           |         |
| <i>Sox10</i>      | 5'-ATGTCAGATGGGAACCCAGA-3'    | exon2           | 74bp    |
|                   | 5'-GTCTTTGGGTGTTGGAG-3'       | exon3           |         |

**for human**

|                  |                                 |         |       |
|------------------|---------------------------------|---------|-------|
| <i>RPL13A</i>    | 5'-CCCTGGAGGAGAAGAGGAAA-3'      | exon11  | 91bp  |
|                  | 5'-ACGTTCTCTCGGCCTGTTT-3'       | exon12  |       |
| <i>PAX3</i>      | 5'-AGGAAGGAGGCAGAGGAAAG-3'      | exon6   | 174bp |
|                  | 5'-CAGCTGTTCTGCTGTGAAGG-3'      | exon10  |       |
| <i>PAX3(UTR)</i> | 5'-AAGCCAGCTGACTGTTCCAG-3'      | exon12  | 74bp  |
|                  | 5'-CCGCAAGATGTTGTTGACAT-3'      | exon12  |       |
| <i>PAX7</i>      | 5'-GGGATTCCTTTGGAAGTGT-3'       | exon1-2 | 198bp |
|                  | 5'-CGCAAAGAATCTGGAGAC-3'        | exon2   |       |
| <i>CALCR</i>     | 5'-CCCTTGTCTTCTATTGAGCTG-3'     | exon2   | 69bp  |
|                  | 5'-GGTAATAGCATGGATAGTGGTTGGt-3' | exon3   |       |
| <i>MYF5</i>      | 5'-CTATAGCCTGCCGGGACAGA-3'      | exon1   | 95bp  |
|                  | 5'-TGGACCAGACAGGACTGTACAT-3'    | exon3   |       |
| <i>DMRT2</i>     | 5'-GAACCACCAAGCAAGGACTTC-3'     | exon5   | 75bp  |
|                  | 5'-CCCAGACCCTGAATACTGCAT-3'     | exon5   |       |
| <i>NFIX</i>      | 5'-TGACTCCTCCATCACCTTCA-3'      | exon8   | 71bp  |
|                  | 5'-GGGTCCGATGCTGACAAA-3'        | exon9   |       |
| <i>NAPIL5</i>    | 5'-GTGTGCATGGACCTTGGAG-3'       | exon1   | 62bp  |
|                  | 5'-CCTCTCGTCATCCTCGTACT-3'      | exon1   |       |
| <i>SPRY1</i>     | 5'-TCCCTGGTCATAGGTCGAAAG-3'     | exon4   | 187bp |
|                  | 5'-TGCCGGTTACAGGCCAAAC-3'       | exon4   |       |
| <i>MSGN1</i>     | 5'-GGAGAAGCTCAGGATGAGGA-3'      | exon1   | 145bp |
|                  | 5'-GTCTGTGAGTTCCTCCGATGT-3'     | exon1   |       |
| <i>TBX6</i>      | 5'-GAACGGCAGAAACTGTAAGAGG-3'    | exon5   | 101bp |
|                  | 5'-GTGTGTCTCCGCTCCCATAG-3'      | exon6   |       |
| <i>PDGFRa</i>    | 5'-AACCGTGATAAAGTCAGGGGA-3'     | exon4   | 126bp |
|                  | 5'-ATTTCTTCCAGCATTGTGAT-3'      | exon6   |       |
| <i>SOX1</i>      | 5'-ACCAGGCCATGGATGAAG-3'        | exon1   | 67bp  |
|                  | 5'-CTTAAATTGCTGGGGAATTGG-3'     | exon1   |       |
| <i>SOX10</i>     | 5'-CGGACCAGTACCCGCACCT-3'       | exon2   | 87bp  |
|                  | 5'-GGCGCTGTCACTTTCGTTCA-3'      | exon3   |       |
